# Supplementary material for: Repurposing crop aerial parts to provide D-sorbitol for plant-specific growth
Source: Research Square preprint supplement (doi:10.21203/rs.3.rs-8409481/v1), 2026-01-06
Supplement: Supplementary file 2 [file 298afefdb94bf9ad44aafbae.xlsx]

## Sheet: Extended data Tab. 1
	Extended data Tab. 1 Physicochemical properties of the fermentation liquid from the LP-WCFS1-mediated rapid fermentation system
	Sample	N /(mg/l)	P /(mg/l)	K / (mg/l)	Ca /(mg/l)	Mg / (mg/l)	Fe /(mg/l)	Zn /(mg/l)	EC / (mS·cmˉ¹)	pH	ρ (g/m³)
	FL	203.2 ± 20.60	106.46 ± 1.93	232.5 ± 6.25	322.5 ± 65.08	70 ± 6.72	1.86 ± 0.14	11.25 ± 2.09	3.8 ± 0.12	3.34 ± 0.04	1.008 ± 0.01
	FL (rapid fermentation liquid, 14d), n = 3 biological replicates.

## Sheet: Extended data Tab. 2
	Extended data Tab. 2 Alpha diversity of the LP-WCFS1-mediated rapid fermentation system
	Sample	ace	chao	coverage	shannon	simpson	sobs
	FJ1	16.4075	16	0.999967	0.104349	0.971859	16
	FJ2	15.0734	15	0.999934	0.061236	0.984473	14
	FJ3	17	17	1	0.103318	0.972501	17
	The first column lists sample names, and the remaining columns show the values corresponding to each diversity index type in each sample.

## Sheet: Extended data Tab. 3
	Extended data Tab. 3 Alpha diversity analysis of microbial communities in LP-WCFS1-mediated rapid and long-term fermentation systems
	Sample	Chao	Simpson	Shannon	Pielou e	sobs
	FL1-1	118.75	0.81	0.47	0.11	68
	FL1-2	98	0.78	0.54	0.13	68
	FL1-3	67.59	0.79	0.51	0.12	63
	FL2-1	87.11	0.64	0.72	0.18	59
	FL2-2	68.1	0.67	0.66	0.17	51
	FL2-3	87.4	0.64	0.71	0.17	64
	FL3-1	100.75	0.96	0.12	0.03	50
	FL3-2	69.43	0.97	0.1	0.03	45
	FL3-3	91.5	0.96	0.14	0.04	60
	FLY1-1	62.77	1	0.02	0.01	45
	FLY1-2	63	1	0.02	0.01	44
	FLY1-3	120	0.98	0.08	0.02	43
	FLY2-1	75.25	0.51	0.7	0.18	49
	FLY2-2	64.4	0.51	0.71	0.18	53
	FLY2-3	66	0.55	0.7	0.18	47
	FLY3-1	67.38	0.38	1.04	0.27	46
	FLY3-2	80.63	0.64	0.57	0.15	49
	FLY3-3	72.33	0.7	0.51	0.13	49
	The first column lists sample names, and the remaining columns show the values corresponding to each diversity index type in each sample.

## Sheet: Extended data Tab. 4
	Extended data Tab. 4 T-test for intergroup differences in alpha diversity indices of microbial communities between LP-WCFS1-mediated rapid and long-term fermentation systems
	Estimators	FL-Mean	FL-Sd	FLY-Mean	FLY-Sd	P value (FL-FLY)	FDR (FL-FLY)
	sobs	73.778	11.377	53.667	4.7958	0.0001646	0.001106
	shannon	0.45245	0.25429	0.48558	0.36274	0.8253	0.8282
	simpson	0.80233	0.13467	0.69509	0.23795	0.2565	0.4276
	bootstrap	86.998	12.754	64.762	5.9387	0.0002213	0.001106
	chao	111.63	18.602	88.092	15.106	0.009472	0.02368
	coverage	0.99963	6.44e-05	0.99968	3.95e-05	0.03823	0.07647
	npshannon	0.45575	0.2543	0.48833	0.36274	0.8282	0.8282
	shannoneven	0.10428	0.057875	0.12119	0.091295	0.6451	0.8064
	simpsoneven	0.017503	0.0028431	0.029727	0.010367	0.003571	0.0119
	Pielou e	0.10428	0.057875	0.12119	0.091295	0.6451	0.8064
	Mean: Mean value; SD: Standard deviation; P-value: Probability of false positives; FDR value: Benjamini-Hochberg (BH).

## Sheet: Extended data Tab. 5
	Extended data Tab. 5 Primers used for qRT-PCR
	Name	Gene ID	Primer (5'-3')
	BrACTIN7-F	-	AGAGCCGCTTCCTTCAACATCATT
	BrACTIN7-R		TGGGAACACGGAAGGACATACC
	BrS6PDH-F	BraA09g057360.3.5C	CTTTACCTCGTTCATTTCCCTG
	BrS6PDH-R		TTGTACTTCTCCGCCACTTCTT
	BrSORD-X1-F	BraA10g010750.3.5C	GGAGAAGGCTCAAAGGTGGA
	BrSORD-X1-R		GCAACTAATCCCAGGTTCAAGAG
	BrSORD-X3-F	BraA03g015190.3.5C	AATGTGAGTTTGGAAGAAGGAGC
	BrSORD-X3-R		GAGCAGCCAACATAGTGACAAGA
	BrSUC-X1-F	BraA02g021290.3.5C	TCCCGTTCGCAATGACCA
	BrSUC-X1-R		CTCCCACTTTCTTACCAATCCA
	LsActin-F	-	AGTCTGGCCCATCCATTGTT
	LsActin-R		TCATCCCCAGTCCCATACCC
	LsS6PDH-F	LOC111903726	AGACAGGATTGGTGAAGAGGGAG
	LsS6PDH-R		TGGGGAAGTGAACAAGGAAGAG
	LsSORD-F	LOC111903235	GGAAAGAGTGATGGCTCAAATG
	LsSORD-R		CTACCGCAGATACCCACAGC

## Sheet: Extended data Tab. 6
	Extended data Tab. 6 Angiosperm species and corresponding NCBI/BRAD sequence IDs
	Species	Gene ID	Name	Function
	Lactuca sativa	XP_023754778.1	LsSORD	sorbitol dehydrogenase
	Brassica oleracea	XP_013612062.1	BoSORD	PREDICTED: sorbitol dehydrogenase
	Brassica rapa	BraA10g010750.3.5C	BrSORD-X1	sorbitol dehydrogenase isoform X1
	Arabidopsis thaliana	AT5G51970.1	AtSORD	PREDICTED: sorbitol dehydrogenase
	Raphanus sativus	XP_018456762.1	RsSORD	sorbitol dehydrogenase
	Solanum tuberosum	XP_015167175.1	StSORD	sorbitol dehydrogenase
	Malus domestica	XP_008376994.1	MdSORD	sorbitol dehydrogenase
	Zea mays	NP_001149440.2	ZmSORD	sorbitol dehydrogenase
	Lactuca sativa	XP_023755248.1	LsS6PDH	NADP-dependent D-sorbitol-6-phosphate dehydrogenase
	Brassica oleracea	XP_013600186.1	BoS6PDH	PREDICTED: NADP-dependent D-sorbitol-6-phosphate dehydrogenase-like
	Brassica rapa	BraA09g057360.3.5C	BrS6PDH	NADP-dependent D-sorbitol-6-phosphate dehydrogenase
	Raphanus sativus	XP_018433540.1	RsS6PDH	NADP-dependent D-sorbitol-6-phosphate dehydrogenase
	Solanum tuberosum	XP_010315337.1	StS6PDH	NADP-dependent D-sorbitol-6-phosphate dehydrogenase
	Malus domestica	NP_001280957.1	MdS6PDH	NADP-dependent D-sorbitol-6-phosphate dehydrogenase
	Zea mays	NP_001149399.2	ZmS6PDH	NADP-dependent D-sorbitol-6-phosphate dehydrogenase

## Sheet: Extended data Tab. 7
	Extended data Tab. 7 Dry matter degradation rate of watermelon aerial parts in the LP-WCFS1-mediated rapid fermentation system
	Sample	Fresh weight (g)	Dry weight (g)	Moisture content of the same batch (%)	weight after fermentation (g)	Dry weight after fermentation (g)	Dry matter degradation rate (%)
	FW1	40	5.26	86.85	18.8	2.42	53.99
	FW2	40	5.26	86.86	22.8	2.93	44.25
	FW3	40	5.45	86.38	20	2.61	52.09

## Sheet: Extended data Tab. 8
	Extended data Tab. 8 Population counts of the rhizosphere microbial community of Brassica rapa following return of LP-WCFS1-mediated rapid fermentation residues and fresh watermelon aerial parts to the field
	Sample	Phylum	Class	Order	Family	Genus	Species
	CK1	27	70	93	133	181	90
	CK2	28	73	96	123	174	75
	CK3	30	70	96	129	182	82
	FW1	26	66	90	133	217	125
	FW2	29	72	99	143	211	116
	FW3	27	66	86	128	216	117
	FR1	29	73	94	132	199	111
	FR2	28	73	92	129	194	110
	FR3	25	68	92	127	197	104
	CK: No return to field; FW: 4 g/plant fresh watermelon aerial parts; FR: 2 g/plant fermentation residues.

## Sheet: Extended data Tab. 9
	Extended data Tab. 9 Alpha diversity analysis of the rhizosphere microbial community of Brassica rapa following return of LP-WCFS1-mediated rapid fermentation residues and fresh watermelon aerial parts to the field
	Sample	Chao	Simpson	Shannon	Pielou e	sobs
	CK1	639.78	0.01	5.1	0.79	618
	CK2	640.37	0.03	4.76	0.74	610
	CK3	641.19	0.02	4.91	0.76	626
	FR1	660.57	0.02	4.8	0.74	636
	FR2	698.07	0.01	5.14	0.79	664
	FR3	645.06	0.02	4.79	0.75	622
	FW1	655.72	0.01	5	0.77	639
	FW2	657.17	0.01	4.99	0.77	628
	FW3	660.89	0.02	4.79	0.74	620
	CK: No return to field; FW: 4 g/plant fresh watermelon aerial parts; FR: 2 g/plant fermentation residues. The first column lists sample names, and the remaining columns show the values corresponding to each diversity index type in each sample.
